# Supplementary material for: Sonneratia apetala seed oil attenuates potassium oxonate/hypoxanthine-induced hyperuricemia and renal injury in mice
Source: Royal Society of Chemistry journal article supplement (doi:10.1039/d1fo01830b), 2021-01-01

## Supplementary Materials

### Contents

|                                                                   |    |
|-------------------------------------------------------------------|----|
| 1. Reference substances for fatty acid composition analysis ..... | 1  |
| 2. Identification of volatile components of SSO .....             | 3  |
| 2.1 Methods.....                                                  | 3  |
| 2.2 Results.....                                                  | 3  |
| 3. Western blots uncropped images.....                            | 5  |
| 3.1 GLUT9.....                                                    | 5  |
| 3.2 URAT1 .....                                                   | 6  |
| 3.3 OAT1.....                                                     | 7  |
| 3.4 $\beta$ -actin for GLUT9, URAT1 and OAT1 .....                | 8  |
| 3.5 Cytosol Keap1.....                                            | 9  |
| 3.6 Cytosol Nrf2.....                                             | 10 |
| 3.7 $\beta$ -actin for cytosol Keap1 and Nrf2.....                | 11 |
| 3.8 Nuclear Nrf2 .....                                            | 12 |
| 3.9 Histone H3 .....                                              | 13 |
| 3.10 TXNIP.....                                                   | 14 |
| 3.11 NLRP3.....                                                   | 15 |
| 3.12 ASC .....                                                    | 16 |
| 3.13 Caspase1 .....                                               | 17 |
| 3.14 $\beta$ -actin for TXNIP, NLRP3, ASC and Caspase1 .....      | 18 |

## 1. Reference substances for fatty acid composition analysis

Reference substances used in the fatty acid composition analysis of *Sonneratia apetala* seed oil (SSO) were shown in Fig.1 and Tab.1. GLC MIXTURE 617 (C4 - C24, purity  $\geq 98.0\%$ ) were purchased from Nu-Chek Prep, Inc (Minnesota, USA).

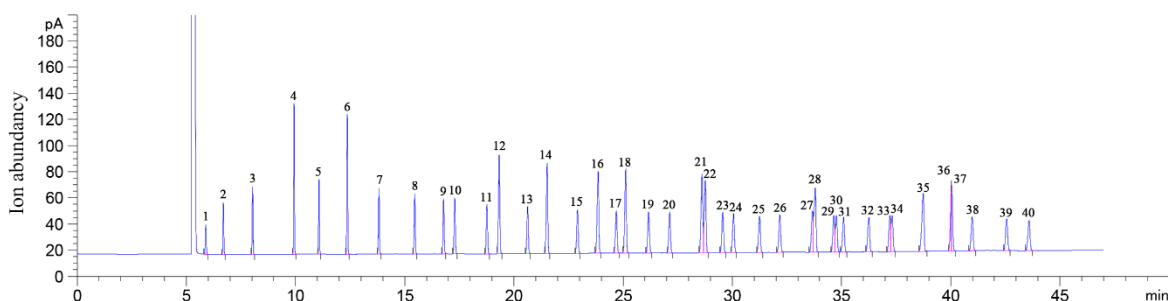

Fig.1 Total ion chromatogram of reference substances for fatty acid composition analysis

Tab.1 Reference substances for fatty acid composition analysis of *Sonneratia apetala* seed oil

| Number | Retention time (min) | Molecular weight | Identification                      | Wt. % |
|--------|----------------------|------------------|-------------------------------------|-------|
| 1      | 5.879                | 88.11            | Butyrate, methyl ester              | 2     |
| 2      | 6.684                | 116.16           | Hexanoate, methyl ester             | 2     |
| 3      | 8.024                | 144.21           | Octanoate, methyl ester             | 2     |
| 4      | 9.922                | 172.26           | Decanoate, methyl ester             | 4     |
| 5      | 11.065               | 186.29           | Hendecanoate, methyl ester          | 2     |
| 6      | 12.357               | 200.32           | Dodecanoate, methyl ester           | 4     |
| 7      | 13.809               | 214.34           | Tridecanate, methyl ester           | 2     |
| 8      | 15.447               | 228.37           | Tetradecanoate, methyl ester        | 2     |
| 9      | 16.766               | 226.35           | (Z)-9-Tetradecenoate, methyl ester  | 2     |
| 10     | 17.281               | 242.40           | Pentadecanoate, methyl ester        | 2     |
| 11     | 18.754               | 240.38           | (Z)-10-Pentadecenoate, methyl ester | 2     |
| 12     | 19.315               | 256.42           | Hexadecanoate, methyl ester         | 4     |
| 13     | 20.616               | 254.41           | (Z)-9-Hexadecenoate, methyl ester   | 2     |
| 14     | 21.508               | 270.45           | Heptadecanoate, methyl ester        | 4     |
| 15     | 22.900               | 268.43           | (Z)-10-Heptadecenoate, methyl ester | 2     |

|    |        |        |                                                              |   |
|----|--------|--------|--------------------------------------------------------------|---|
| 16 | 23.843 | 284.48 | Octadecanoate, methyl ester                                  | 4 |
| 17 | 24.677 | 282.46 | (E)-9-Octadecenoate, methyl ester                            | 2 |
| 18 | 25.104 | 282.46 | (Z)-9-Octadecenoate, methyl ester                            | 4 |
| 19 | 26.155 | 280.44 | (E,E)-9,12-Octadecadienoate, methyl ester                    | 2 |
| 20 | 27.120 | 280.44 | (Z,Z)-9,12-Octadecadienoate, methyl ester                    | 2 |
| 21 | 28.598 | 278.44 | (Z,Z,Z)-6,9,12-Octadecatrienoate, methyl ester               | 4 |
| 22 | 28.752 | 312.53 | Eicosanoate, methyl ester                                    | 4 |
| 23 | 29.549 | 278.44 | (Z,Z,Z)-9,12,15-Octadecatrienoate, methyl ester              | 2 |
| 24 | 30.044 | 310.52 | (Z)-11-Eicosenoate, methyl ester                             | 2 |
| 25 | 31.237 | 326.56 | Heneicosanoate, methyl ester                                 | 2 |
| 26 | 32.166 | 308.53 | (Z,Z)-11,14-Eicosadienoate, methyl ester                     | 2 |
| 27 | 33.661 | 306.48 | (Z,Z,Z)-8,11,14-Eicostrienoate, methyl ester                 | 2 |
| 28 | 33.785 | 340.58 | Docosanoate, methyl ester                                    | 4 |
| 29 | 34.640 | 306.48 | (Z,Z,Z)-11,14,17-Eicostrienoate, methyl ester                | 2 |
| 30 | 34.754 | 304.47 | (Z,Z,Z,Z)-5,8,11,14-Eicosatetraenoate, methyl ester          | 2 |
| 31 | 35.084 | 338.57 | (Z)-13-Docosenoate, methyl ester                             | 2 |
| 32 | 36.240 | 336.55 | (Z,Z)-13,16-Docosadienoate, methyl ester                     | 2 |
| 33 | 37.206 | 354.61 | Tricosanoate, methyl ester                                   | 2 |
| 34 | 37.306 | 302.45 | (Z,Z,Z,Z,Z)-5,8,11,14,17-Eicosapentaenoate, methyl ester     | 2 |
| 35 | 38.729 | 368.64 | Tetracosanoate, methyl ester                                 | 4 |
| 36 | 39.961 | 332.51 | (Z,Z,Z,Z)-7,10,13,16-Docosatetraenoate, methyl ester         | 2 |
| 37 | 40.026 | 366.62 | (Z)-15-Tetracosenoate, methyl ester                          | 2 |
| 38 | 40.970 | 330.50 | (Z,Z,Z,Z,Z)-4,7,10,13,16-Docosapentaenoate, methyl ester     | 2 |
| 39 | 42.550 | 330.50 | (Z,Z,Z,Z,Z)-7,10,13,16,19-Docosapentaenoate, methyl ester    | 2 |
| 40 | 43.573 | 328.49 | (Z,Z,Z,Z,Z,Z)-4,7,10,13,16,19-Docosahexaenoate, methyl ester | 2 |

## 2. Identification of volatile components of SSO

### 2.1 Methods

SSO sample (100  $\mu\text{L}$ ) was extracted with 300  $\mu\text{L}$  of n-hexane and 1 mL of acetonitrile under ultrasound for 20 min. Following centrifugation at  $14000 \times g$  for 10 min ( $4^\circ\text{C}$ ), supernatant was obtained, and the remains was extracted with 1 mL of acetonitrile for another 2 min. The upper extract was also harvested after centrifugation for 10 min ( $14000 \times g$ ,  $4^\circ\text{C}$ ) and mixed with the previously collected supernatant for the GC-MS profiling. The yield of volatile components of SSO was 9.56%.

A total of 5  $\mu\text{L}$  sample was separated with DB-wax GC-Column (30 m  $\times$  0.25 mm, 0.25  $\mu\text{m}$ ), carried by mixed gas of nitrogen and helium at flow rate of 1 mL/min. The temperature of column injector was maintained at  $250^\circ\text{C}$  and split ratio was set at 30:1. Oven temperature was held at  $50^\circ\text{C}$  for 2 min and elevated to  $280^\circ\text{C}$  at rate of  $10^\circ\text{C}/\text{min}$  and held for 20 min. The mass scan parameters were set as followings: electron impact ionization voltage 70 eV; ion source temperature  $250^\circ\text{C}$ ; mass range 30 ~ 450 m/z.

### 2.2 Results

As shown in Fig.2 and Tab.2, the dominant volatile constituents of SSO were free fatty acids and related derivatives including linoleic acid, linoleic acid ethyl ester, (E)-2-heptenal, (E, E)-2,4-decadienal, palmitic acid, oleic acid, etc. Additionally, small amounts of terpenes including squalene, limonene and  $\alpha$ -phellandrene were also found in SSO.

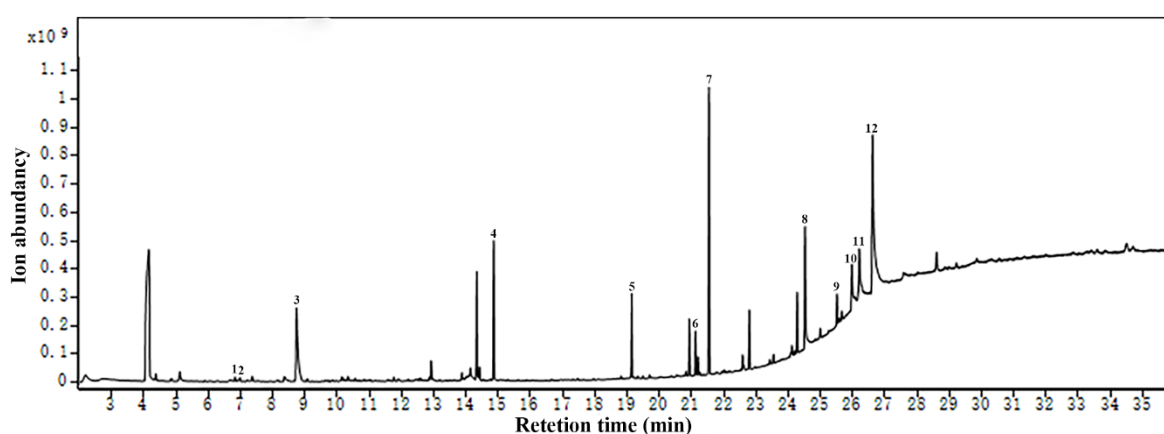

Fig.2 Total ion chromatogram of volatile organic components analysis

Tab. 2 Volatile organic components of *Sonneratia apetala* seed oil

| Number | Retention time (min) | Molecular weight | Molecular formula                              | Indetification                      | % composition |
|--------|----------------------|------------------|------------------------------------------------|-------------------------------------|---------------|
| 1      | 6.829                | 136.23           | C <sub>10</sub> H <sub>16</sub>                | Limonene                            | 0.12          |
| 2      | 6.982                | 136.23           | C <sub>10</sub> H <sub>16</sub>                | $\alpha$ -Phellandrene              | 0.12          |
| 3      | 8.734                | 112.17           | C <sub>7</sub> H <sub>12</sub> O               | (E)-2-Heptenal                      | 5.25          |
| 4      | 14.858               | 152.23           | C <sub>10</sub> H <sub>16</sub> O              | (E, E)-2,4-Decadienal               | 4.74          |
| 5      | 19.148               | 284.48           | C <sub>18</sub> H <sub>36</sub> O <sub>2</sub> | Hexadecanoic acid ethyl ester       | 2.47          |
| 6      | 21.121               | 310.51           | C <sub>20</sub> H <sub>38</sub> O <sub>2</sub> | (E)-9-Octadecenoic acid ethyl ester | 1.23          |
| 7      | 21.541               | 308.50           | C <sub>20</sub> H <sub>36</sub> O <sub>2</sub> | Octadecadienoic acid ethyl ester    | 9.25          |
| 8      | 24.519               | 256.42           | C <sub>16</sub> H <sub>32</sub> O <sub>2</sub> | n-Hexadecanoic acid                 | 4.62          |
| 9      | 25.513               | 410.70           | C <sub>30</sub> H <sub>50</sub>                | Squalene                            | 0.95          |
| 10     | 25.973               | 284.48           | C <sub>18</sub> H <sub>36</sub> O <sub>2</sub> | Octadecanoic acid                   | 2.25          |
| 11     | 26.207               | 282.46           | C <sub>18</sub> H <sub>34</sub> O <sub>2</sub> | Octadecenoic acid                   | 2.89          |
| 12     | 26.614               | 280.45           | C <sub>18</sub> H <sub>32</sub> O <sub>2</sub> | (Z, Z)-9,12-Octadecadienoic acid    | 12.64         |

### 3. Western blots uncropped images

#### 3.1 GLUT9 (The band in the red frame is the target band)

Intact, Vehicle, BZM, FBX, 50 mg/kg of SSO, 100 mg/kg of SSO, 200 mg/kg of SSO

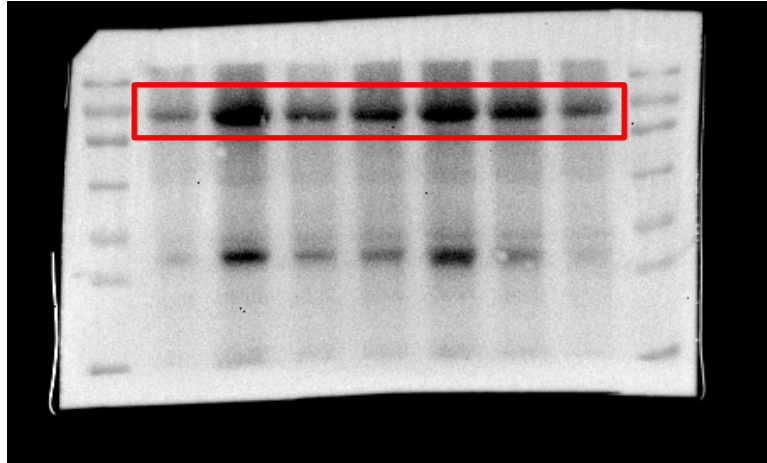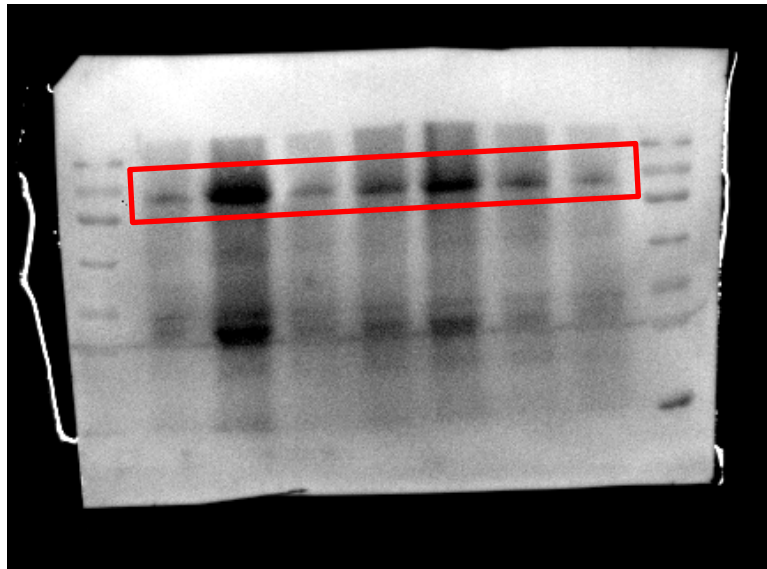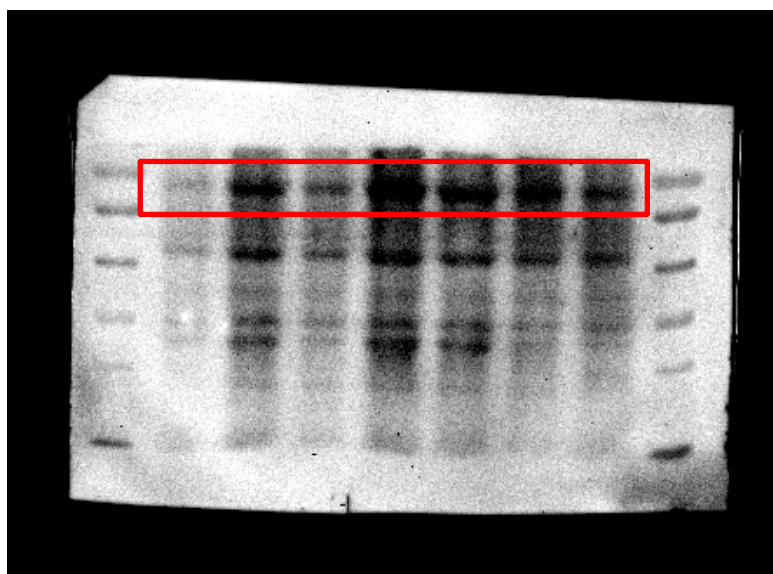

**3.2 URAT1 (The band in the red frame is the target band)**

Intact, Vehicle, BZM, FBX, 50 mg/kg of SSO, 100 mg/kg of SSO, 200 mg/kg of SSO

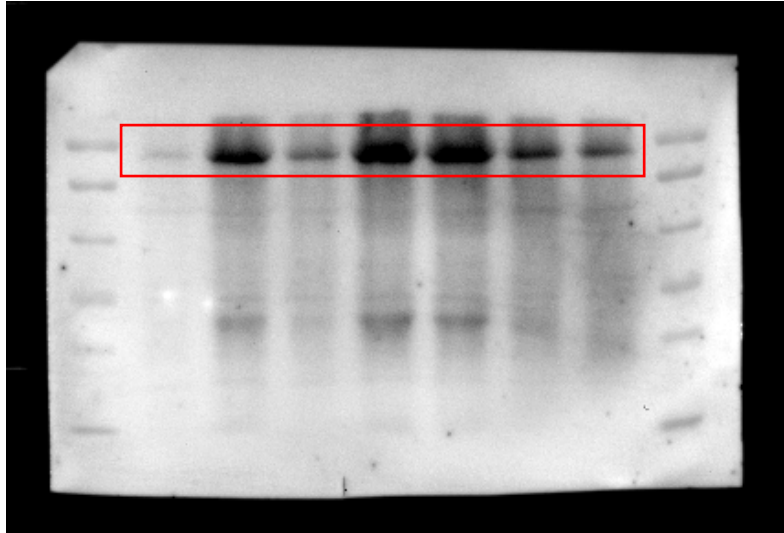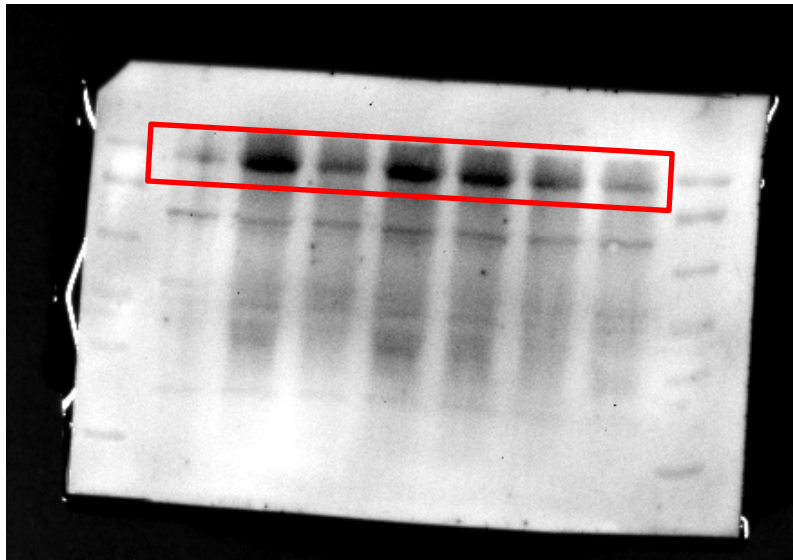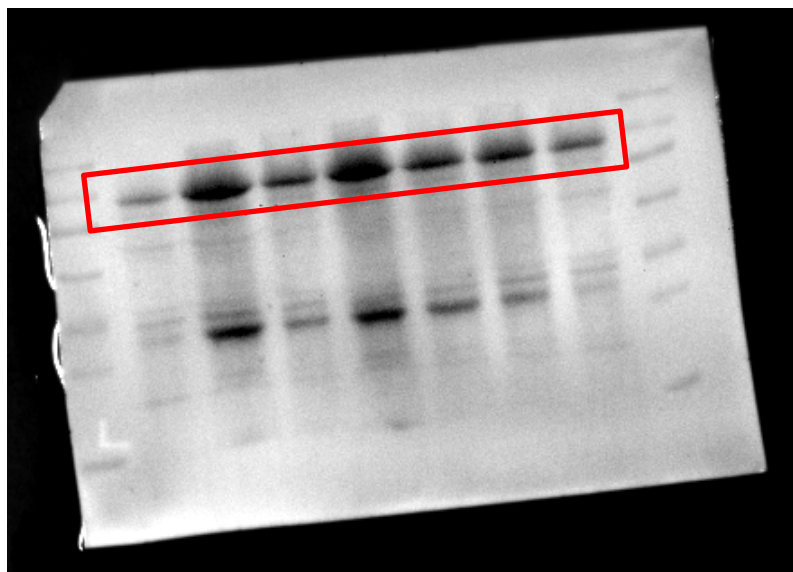

### 3.3 OAT1 (The band in the red frame is the target band)

Intact, Vehicle, BZM, FBX, 50 mg/kg of SSO, 100 mg/kg of SSO, 200 mg/kg of SSO

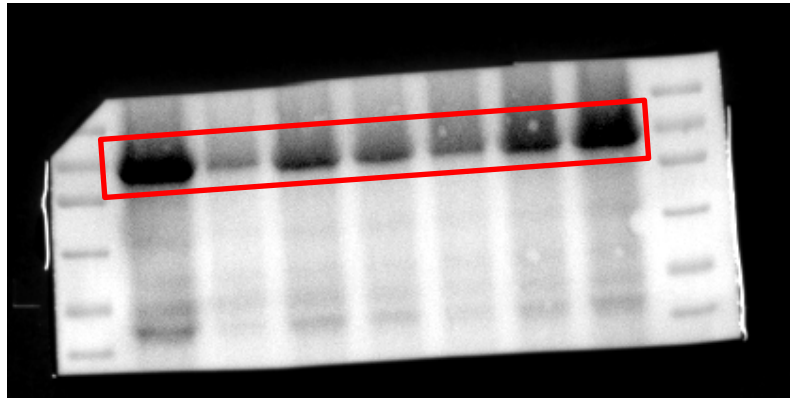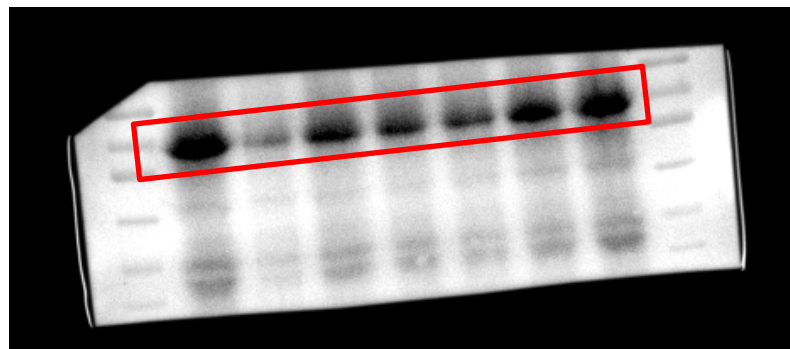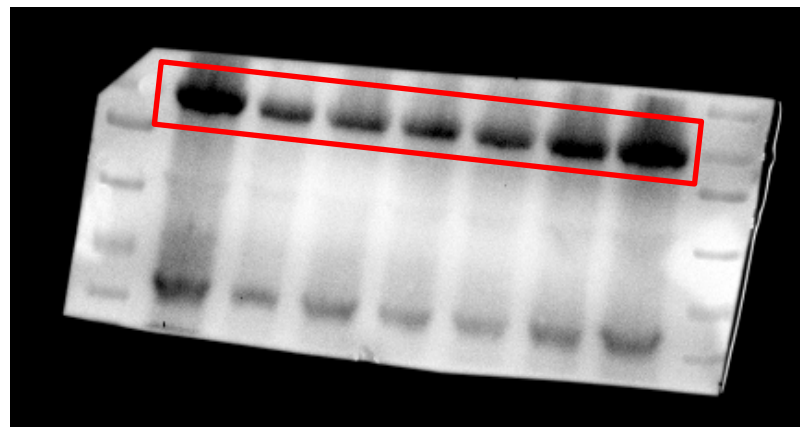



**3.4  $\beta$ -actin for GLUT9, URAT1 and OAT1 (The band in the red frame is the target band)**

Intact, Vehicle, BZM, FBX, 50 mg/kg of SSO, 100 mg/kg of SSO, 200 mg/kg of SSO

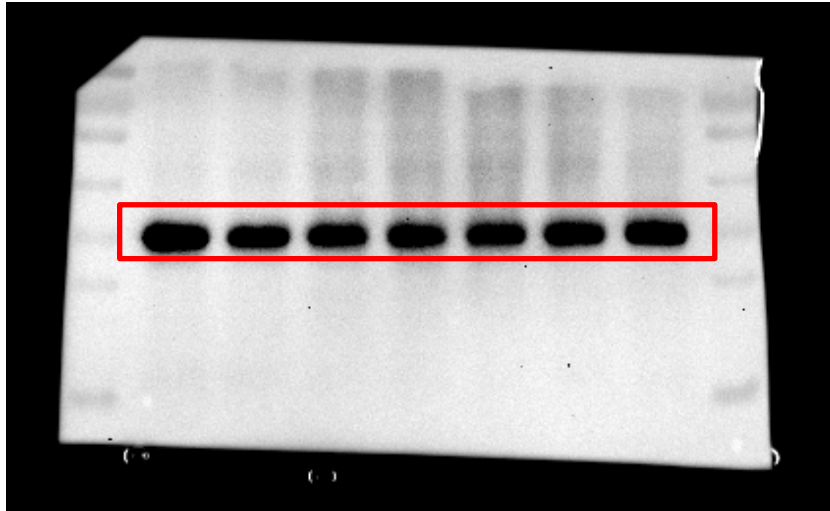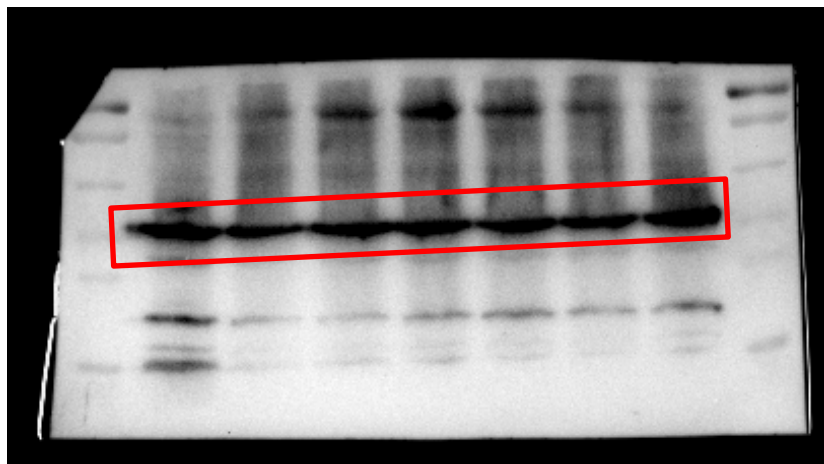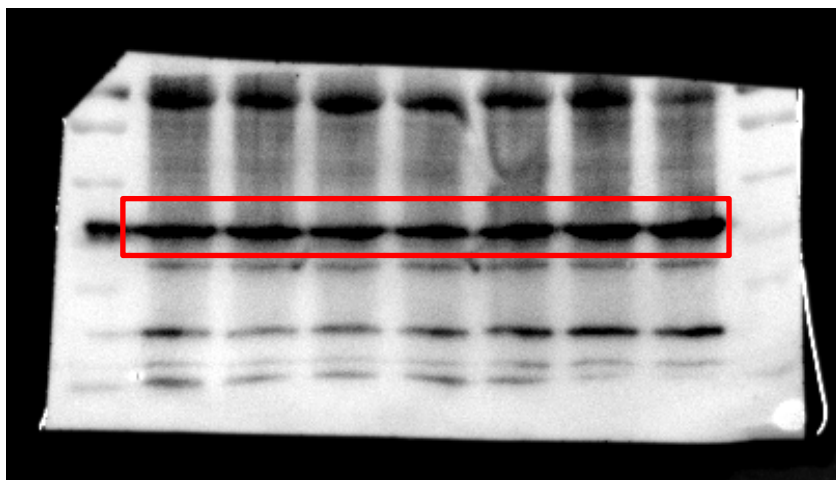

### 3.5 Cytosol Keap1 (The band in the red frame is the target band)

Intact, Vehicle, BZM, FBX, 50 mg/kg of SSO, 100 mg/kg of SSO, 200 mg/kg of SSO

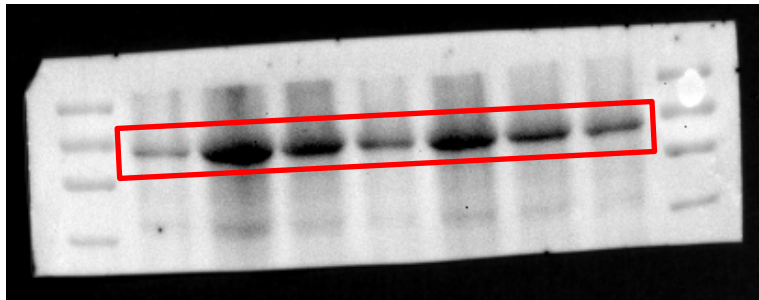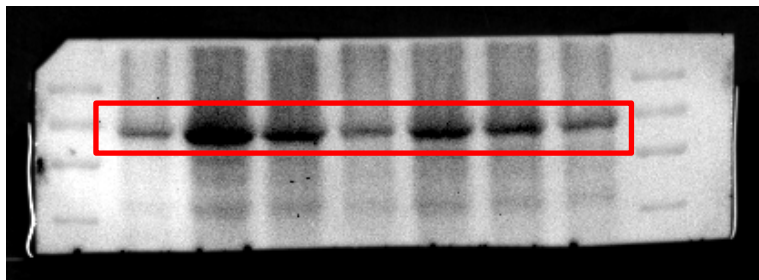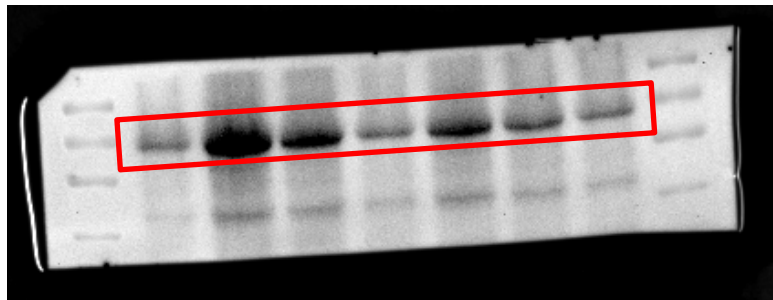

### 3.6 Cytosol Nrf2 (The band in the red frame is the target band)

Intact, Vehicle, BZM, FBX, 50 mg/kg of SSO, 100 mg/kg of SSO, 200 mg/kg of SSO

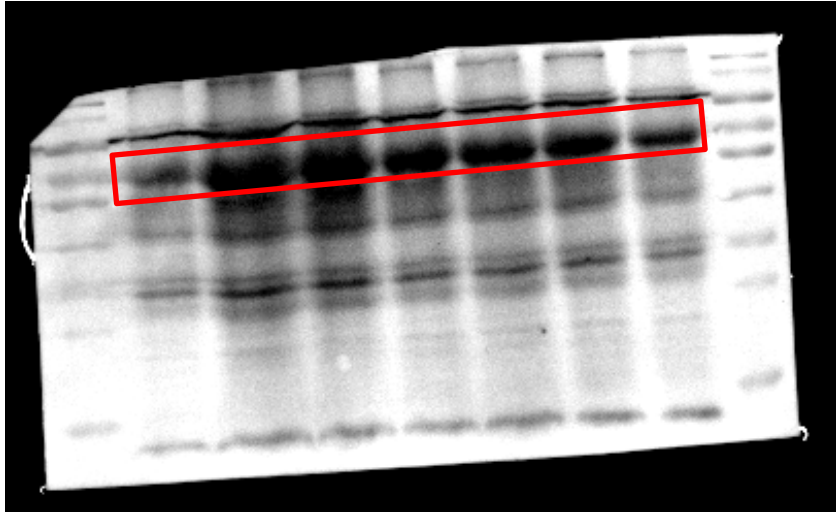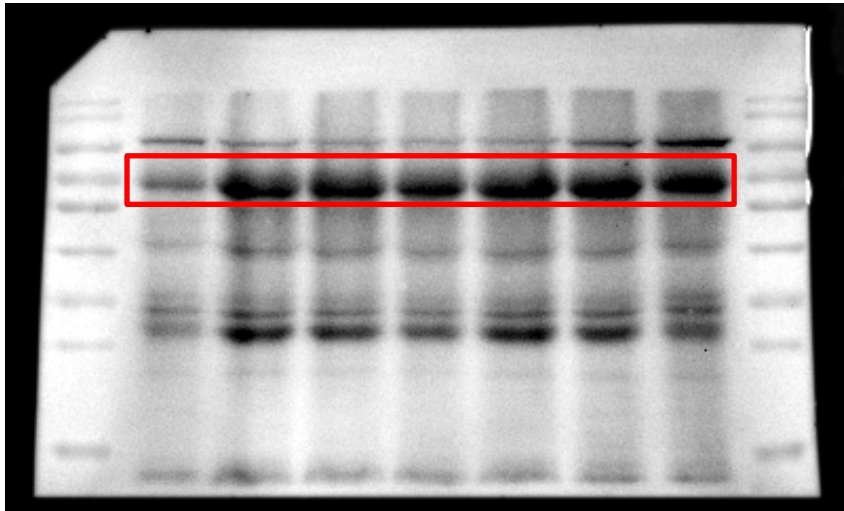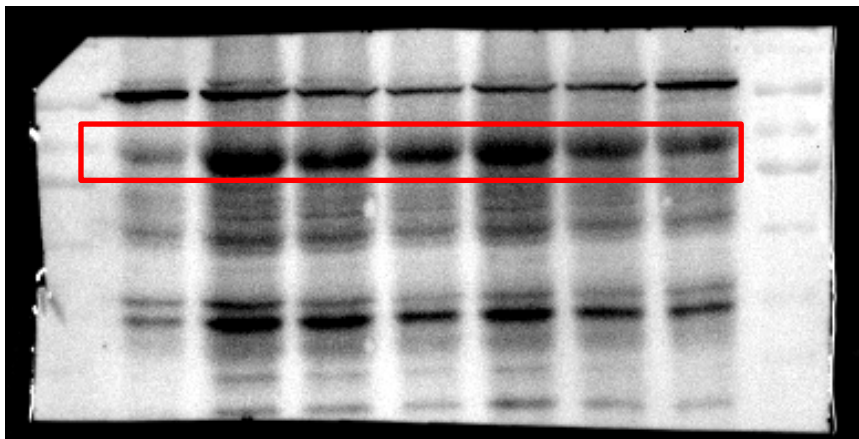

**3.7  $\beta$ -actin for cytosol Keap1 and Nrf2 (The band in the red frame is the target band)**

Intact, Vehicle, BZM, FBX, 50 mg/kg of SSO, 100 mg/kg of SSO, 200 mg/kg of SSO

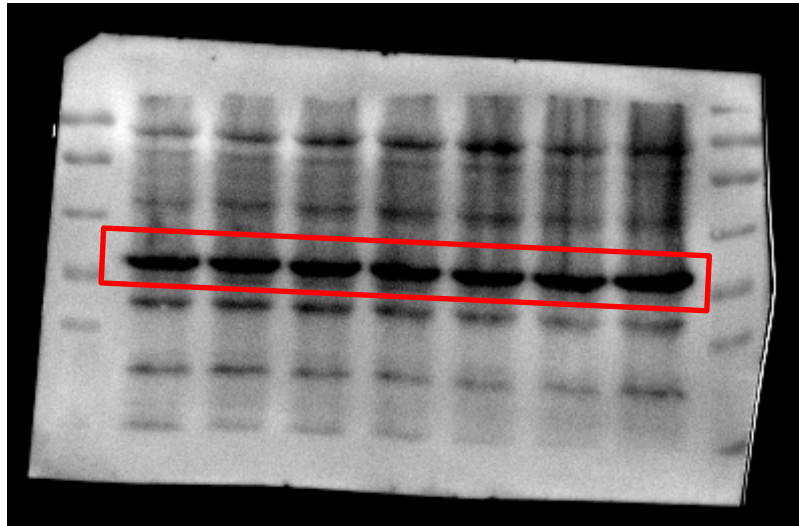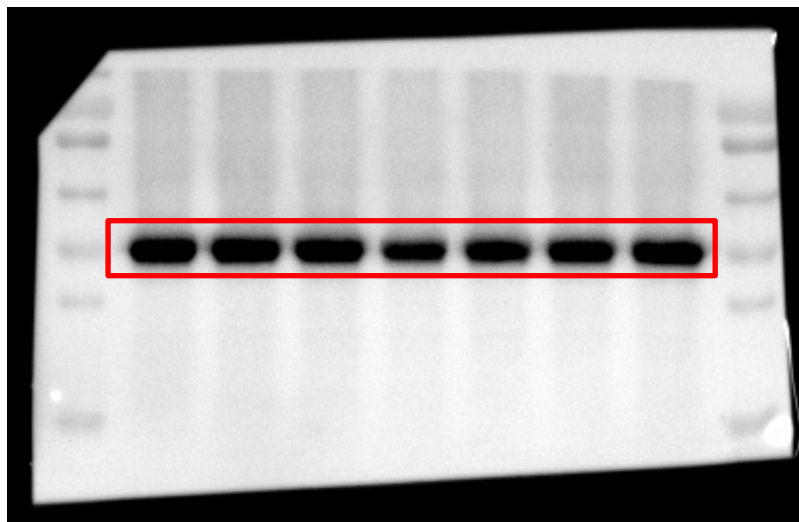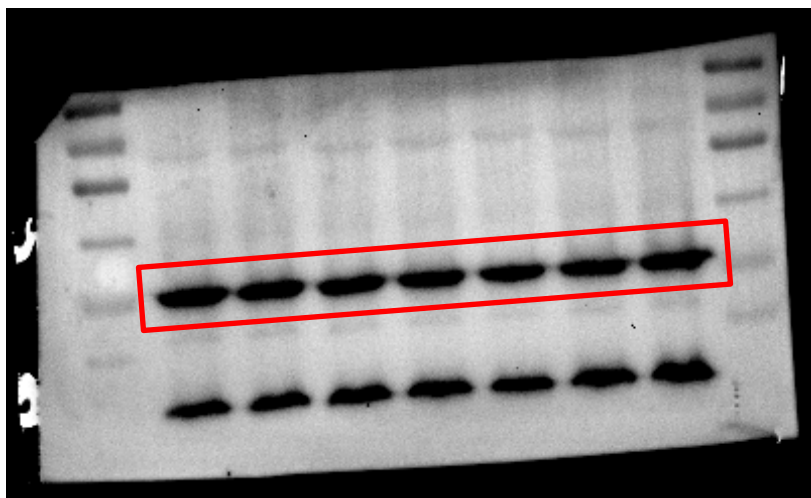

**3.8 Nuclear Nrf2 (The band in the red frame is the target band)**

Intact, Vehicle, BZM, FBX, 50 mg/kg of SSO, 100 mg/kg of SSO, 200 mg/kg of SSO

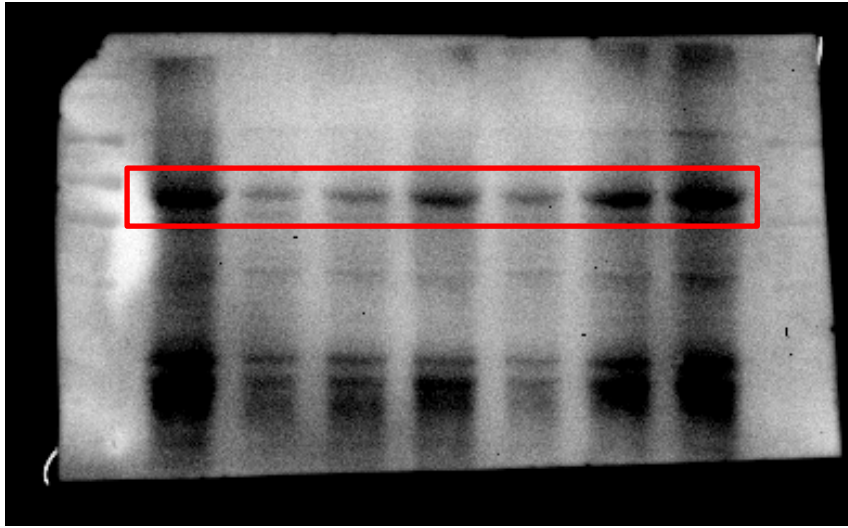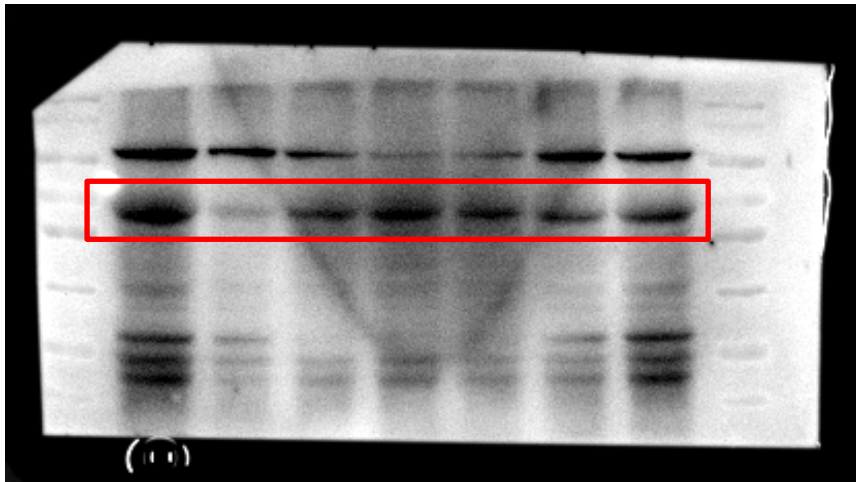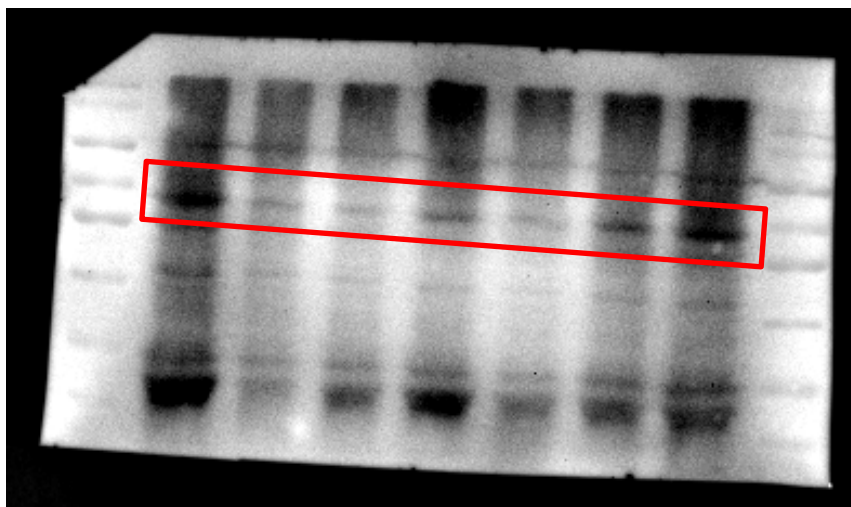

### 3.9 Histone H3 (The band in the red frame is the target band)

Intact, Vehicle, BZM, FBX, 50 mg/kg of SSO, 100 mg/kg of SSO, 200 mg/kg of SSO

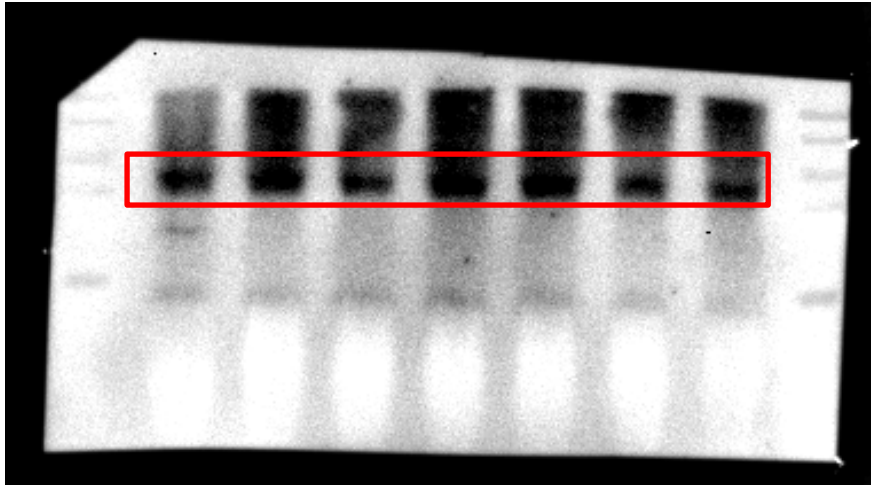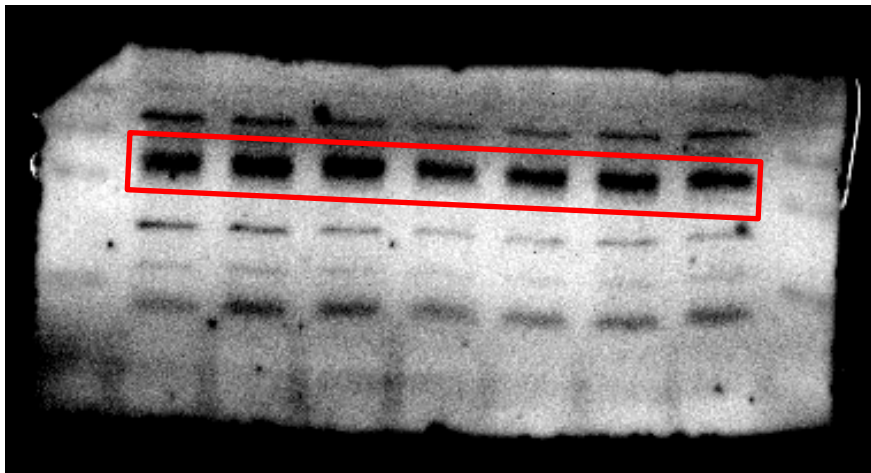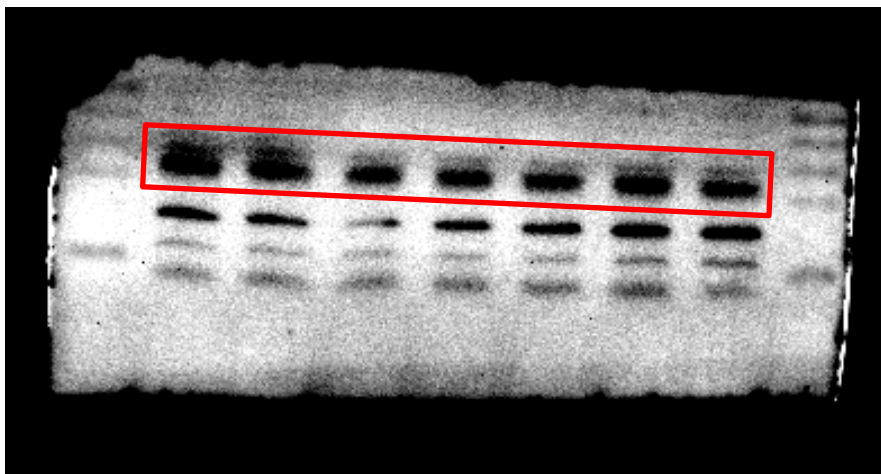

**3.10 TXNIP (The band in the red frame is the target band)**

Intact, Vehicle, BZM, FBX, 50 mg/kg of SSO, 100 mg/kg of SSO, 200 mg/kg of SSO

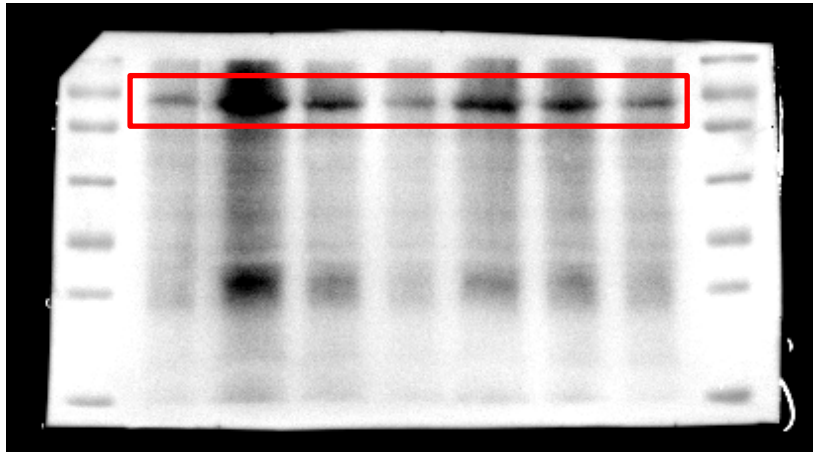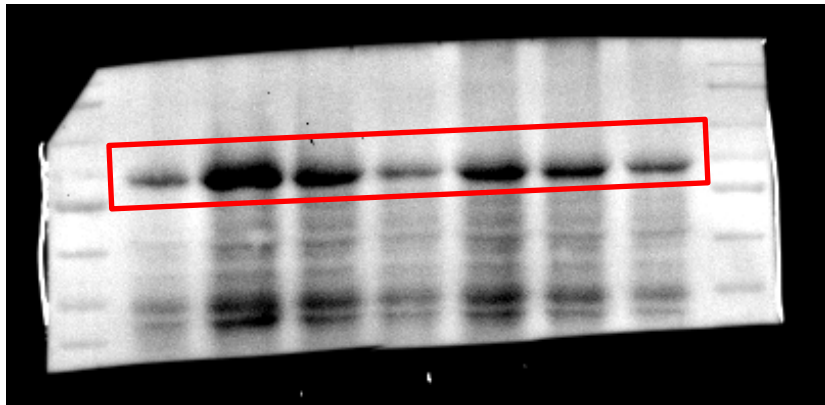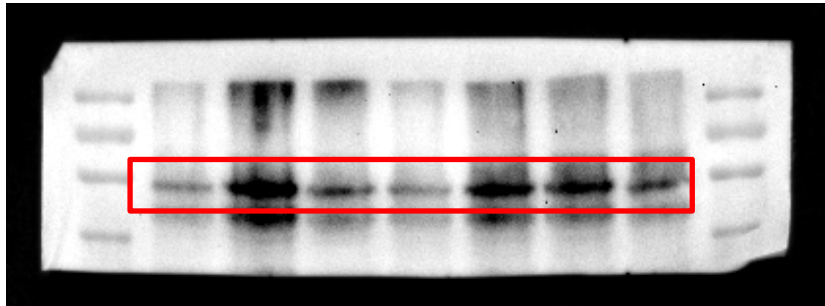

### 3.11 NLRP3 (The band in the red frame is the target band)

Intact, Vehicle, BZM, FBX, 50 mg/kg of SSO, 100 mg/kg of SSO, 200 mg/kg of SSO

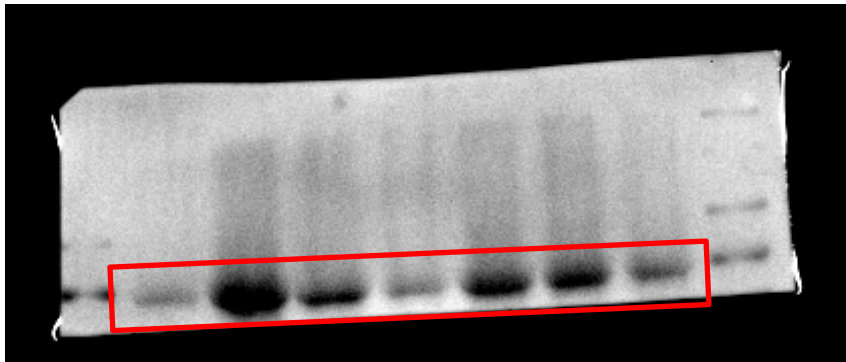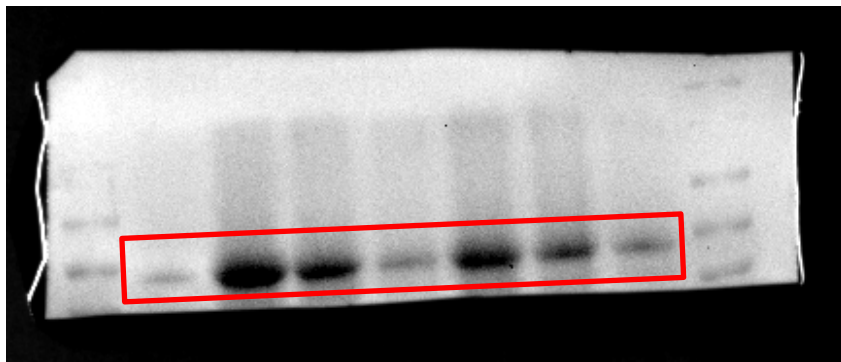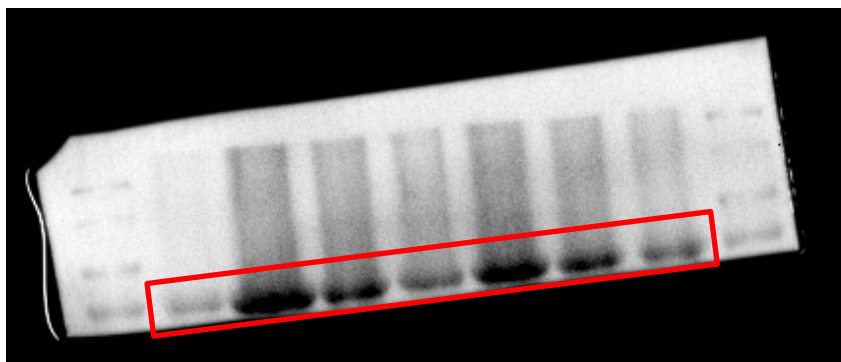



**3.12 ASC (The band in the red frame is the target band)**

Intact, Vehicle, BZM, FBX, 50 mg/kg of SSO, 100 mg/kg of SSO, 200 mg/kg of SSO

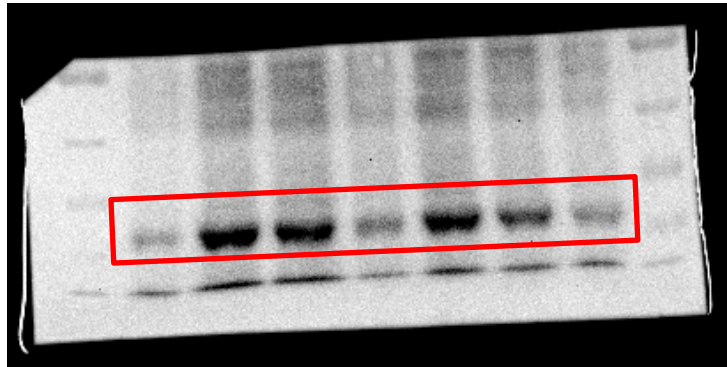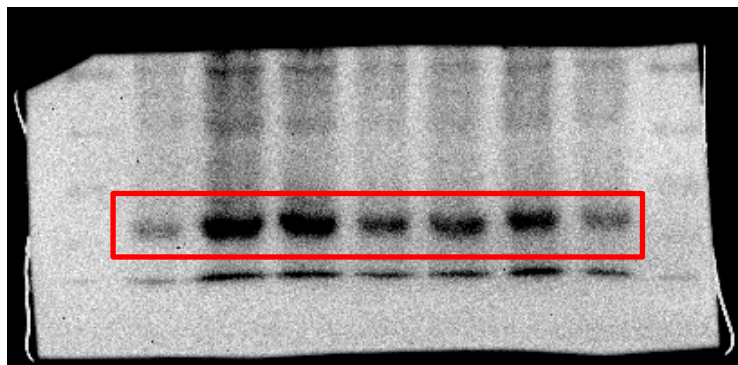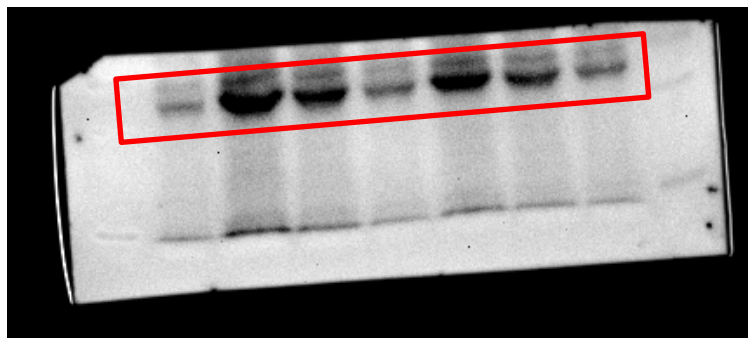

### 3.13 Caspase1 (The band in the red frame is the target band)

Intact, Vehicle, BZM, FBX, 50 mg/kg of SSO, 100 mg/kg of SSO, 200 mg/kg of SSO

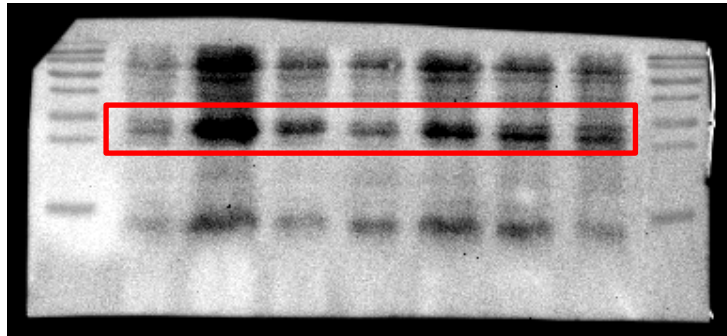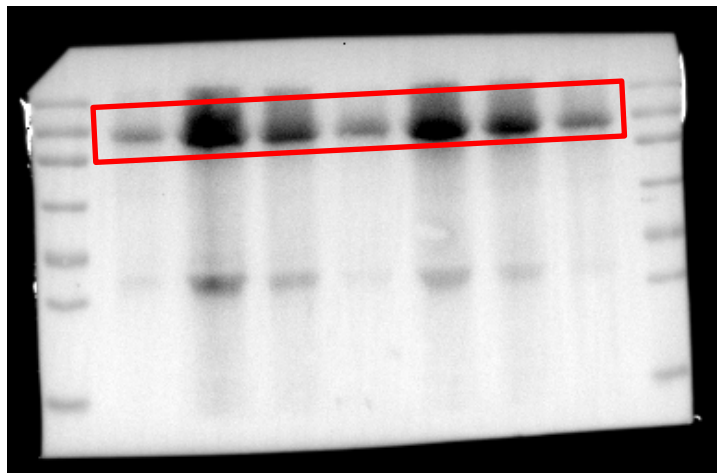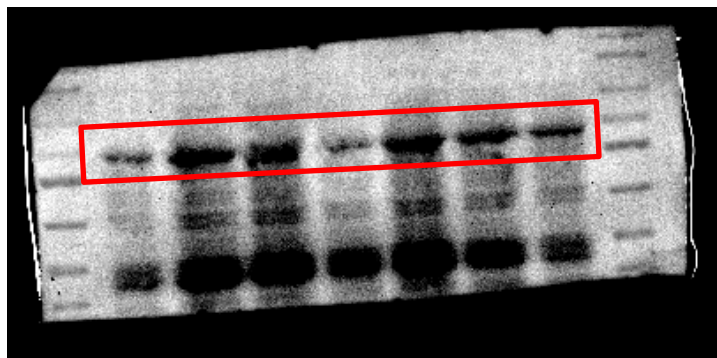

**3.14  $\beta$ -actin for TXNIP, NLRP3, ASC and Caspase1(The band in the red frame is the target band)**

Intact, Vehicle, BZM, FBX, 50 mg/kg of SSO, 100 mg/kg of SSO, 200 mg/kg of SSO

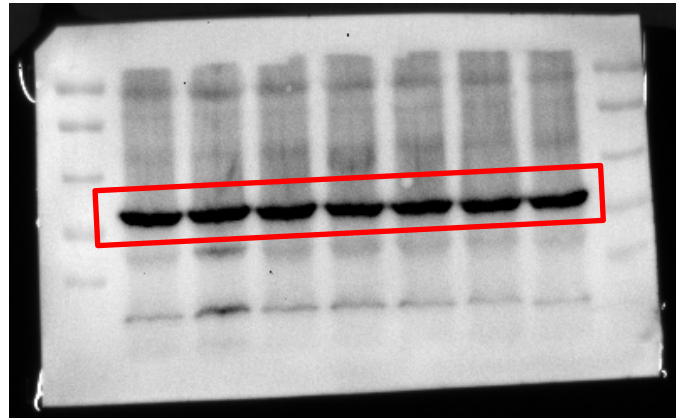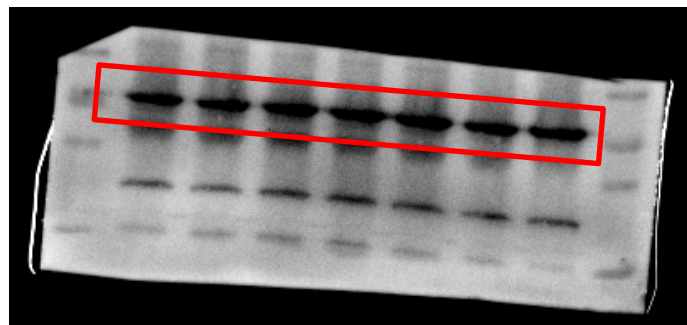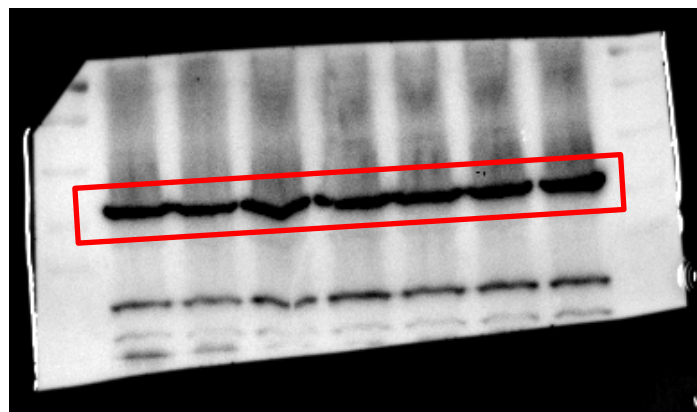

Supplement: d1fo01830b1.pdf [file d1fo01830b1.pdf]
